# Supplementary material for: A high-precision zenith tropospheric delay forecasting model using ET-based spatial interpolation compensation and CNN-LSTM multi-step time series prediction
Source: Research Square preprint supplement (doi:10.21203/rs.3.rs-6241875/v1), 2025-09-11
Supplement: Supplementary file 1 [file ae62b4d4a6507181638182a9.docx]

# Supplementary Materials for

**A high-precision zenith tropospheric delay forecasting model using ET-based spatial interpolation compensation and CNN-LSTM multi-step time series prediction**

Jiahao Zhang (a), Qin Liang (a),(b),(c) and Yunqing Huang (a),(b),(c)

1. School of Mathematics and Computational Science, Xiangtan University, Xiangtan 411105, China.
2. National Center for Applied Mathematics in Hunan, Xiangtan 411105, China.
3. Hunan Key Laboratory for Computation and Simulation in Science and Engineering, Xiangtan 411105, China.

*Correspondence to:* Qin Liang (liangqin1997@xtu.edu.cn) and Yunqing Huang (huangyq@xtu.edu.cn)

**Introduction**

Since we only focus on what is new in the manuscript, therefore, supplementary material can be used to shorten the manuscript. Supplement details how to use ERA5 reanalyze grid meteorological data to calculate ZTD estimates for target stations, ERA5_ZTD.

# Supplement

Obtaining at pressure level of the grid points by ERA5 data

ZTD value can be obtained by integrating refractivity in the zenith direction, from the given altitude to the top of the lower atmosphere. ZTD can be divided into ZHD, caused by dry air, and ZWD, caused by water vapor. Since there is a gap between the top altitude that can be reached by the soundings and the top altitude involved in ZHD, ZHD can be calculated using the ERA5 data and using Saastamoinen model in the top layer of the pressure level. Therefore, ZHD estimates at pressure level of the grid points can be calculated by the formula:

(1)

Here and are the geopotential (unit: m) at pressure level and latitude of the grid points, respectively. and represent geopotential (unit: m) and pressure (unit: hPa) at the top layer of the pressure level, respectively. is the hydrostatic refractivity in the lower atmosphere. It can be expressed approximately as:

(2)

(3)

Here , and are the partial pressure of dry air (unit: hPa), the absolute temperature (unit: K) and Celsius temperature (unit:) at a certain pressure level of the ERA5 data, respectively. Since the partial pressure of water vapor at the top layer in the ERA5 data is very small, the part of the zenith wet delay above the top layer can be ignored. ZWD estimates can be calculated using the ERA5 data by the formula:

(4)

(5)

(6)

Here is wet refractivity in the lower atmosphere and is the partial pressure of water vapor (unit: hPa) at a certain pressure level of the ERA5 data. , and are atmospheric refraction coefficients, and are compressibility factors for dry air and water vapor, respectively. and are molar mass (unit: g/mol) for dry air and water vapor, respectively. Note in (2-6), data , , are all related to the height . where is the total pressure (unit: hPa) at a certain pressure level of the ERA5 data. where can be calculated from the relative humidity , and their converted expression are as follows:

(7)

These data including the , , and geopotential of 37 pressure levels can be obtained from the ERA5 data.

Using numerical integration in the calculation process of (1) and (4), we can obtain ERA5-derived ZTDs at pressure level of the grid points by

(8)

Obtaining ERA5_ZTD for target stations by ERA5 data

Since the altitude used for the target station height is different from the standard of geopotential used in the ERA5 data, we convert the altitude of the target station to the geopotential by the formula:

(9)

(10)

(11)

where and are the latitude and the ellipsoid height at the station. is the normal gravity (unit:) on the surface of the ellipsoid of revolution for latitude , represents an effective radius (unit: m) of the earth for latitude , is the normal gravity (unit:) on the surface of the ellipsoid of revolution for latitude .

For a single target station, assume that the ERA5-derived ZTDs at 37 pressure layers of its closest four grid points are , , and , =1,.....37. Assuming that the closest pressure layers to this target site height at these four grid points are , (*k*=1,2,3,4, <), the ZTD estimates at the same height as the target site at the four grid points can be calculated by linear interpolation:

(12)

Finally, the ERA_ZTD of the target site can be obtained by inverse distance weighted interpolation:

(13)

where is the vertical distance(unit: km) from the target station to the four grid points.
